# Supplementary material
Source: PubMed Central journal article supplement (PMC8790654)
Supplement: NIHMS1770337-supplement-supplementary_movie_legend.pdf [file NIHMS1770337-supplement-supplementary_movie_legend.pdf]

## **Supplementary movie legend**

### **Video**

The video shows orca mother and calf at 4 weeks postpartum, at which point some sleep behaviour has just begun to return in the mother. The neonate, circling and vocalizing, remains more active than the mother during this recording, as it does throughout development.
